# Supplementary material
Source: PubMed Central journal article supplement (PMC3705603)

# Supplementary Figure 1

A

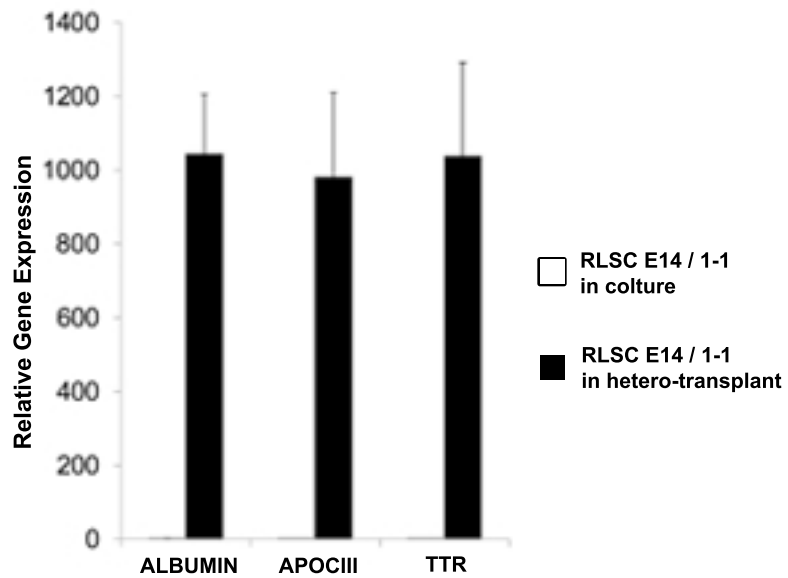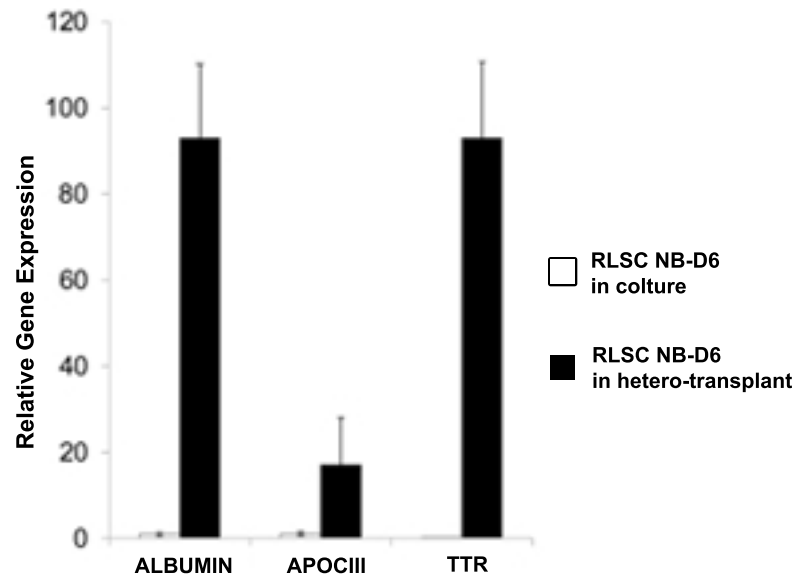

B

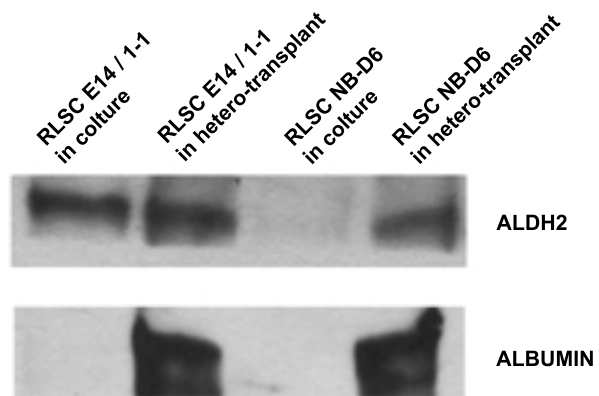

Supplement: cdd201349x2.pdf [file cdd201349x2.pdf]
